# Supplementary material for: Ultrasensitive ultrasound imaging of gene expression with signal unmixing
Source: Springer Nature journal article supplement (doi:10.1038/s41592-021-01229-w), 2021-08-01
Supplement: MOESM8 [file 41592_2021_1229_MOESM8_ESM.xlsx]

## Sheet: Extended_Data_Fig_6_d
BURST, 10^8 cells/ml	BURST, 10^7 cells/ml	BURST, 10^6 cells/ml	BURST, 10^5 cells/ml	BURST, 10^4 cells/ml	BURST, 10^3 cells/ml	BURST+, 10^8 cells/ml	BURST+, 10^7 cells/ml	BURST+, 10^6 cells/ml	BURST+, 10^5 cells/ml	BURST+, 10^4 cells/ml	BURST+, 10^3 cells/ml
38.8908	46.1455	35.0296	27.4597	10.9389	4.59641	24.8291	35.7095	28.5262	34.8173	30.7993	13.1578
34.0821	42.1987	43.6655	27.6087	7.55207	14.7956	22.7159	41.373	35.9971	39.5892	21.6786	15.3679
34.509	40.7934	33.5785	17.424	13.5132	0.398095	24.2572	33.1591	34.767	37.0795	17.7408	16.5841
35.3559	47.5765	34.5492	27.7481	11.5206	0.191077	22.4033	47.2548	38.0318	43.6453	25.3766	2.69268
47.8368	28.5663	49.1539	43.5041	18.8962	5.80598	43.327	26.7317	48.247	38.3528	33.3884	-1.05541
37.0081	33.5748	55.1453	11.8664	16.6355	-0.499922	30.3172	14.3671	35.5545	33.7337	35.2697	14.408
38.2402	34.743	48.5548	31.229	17.2268	7.26717	35.6336	33.0202	27.9173	36.1019	31.1894	5.69208
52.815	52.7584	47.3101	29.7139	24.3744	14.9552	30.4824	29.37	36.7107	39.4838	27.0406	30.6557
44.7539	36.2487	26.2792	21.5639	16.4843	20.1563	11.3383	34.6215	24.9011	29.2759	17.667	18.3652
38.506	36.0934	25.0361	26.9088	14.2849	4.48932	24.8189	25.4856	22.2837	41.1475	28.4394	15.7705
39.6583	34.8945	24.1331	26.6505	11.0928	9.02379	29.7446	33.339	23.8171	31.5713	21.8654	13.1101
38.2941	43.1122	36.8715	17.5532	18.8648	11.3997	28.8591	36.6343	27.1297	27.6585	30.8913	18.5158
